# Supplementary material for: Outcomes of marginal zone lymphoma treated with ibrutinib in the first-line setting in the United States: a real-world analysis
Source: PubMed Central journal article supplement — Blood Adv. 2023 Dec 15;8(3):549–52. doi: 10.1182/bloodadvances.2023011698 (PMC10835265; doi:10.1182/bloodadvances.2023011698), 2023-12-15
Supplement: BLOODA_ADV-2023-011698-mmc1.pdf [file BLOODA_ADV-2023-011698-mmc1.pdf]

**Table S1. Modeling on risk of CR on ibrutinib**

| <b>Variable</b>                        | <b>RR</b> | <b>95% CI</b> | <b>p-value</b> |
|----------------------------------------|-----------|---------------|----------------|
| Age at diagnosis                       | 1.04      | 0.96-1.11     | 0.33           |
| Gender                                 |           |               |                |
| Male                                   | Referent  |               |                |
| Female                                 | 0.93      | 0.22-3.91     | 0.92           |
| BMI                                    |           |               |                |
| <30                                    | Referent  |               |                |
| ≥30                                    | 0.50      | 0.07-3.39     | 0.48           |
| ECOG PS at diagnosis                   |           |               |                |
| 0                                      | Referent  |               |                |
| 1                                      | 1.50      | 0.35-6.38     | 0.58           |
| MZL subtype                            |           |               |                |
| NMZL                                   | Referent  |               |                |
| SMZL                                   | 0.42      | 0.06-2.85     | 0.37           |
| EMZL                                   | 0.56      | 0.09-3.47     | 0.53           |
| Stage at diagnosis                     |           |               |                |
| 1-2                                    | Referent  |               |                |
| 3-4                                    | 0.80      | 0.15-4.17     | 0.79           |
| B symptoms at diagnosis                |           |               |                |
| No                                     | Referent  |               |                |
| Yes                                    | 2.00      | 0.56-7.17     | 0.29           |
| LDH higher than institutional baseline |           |               |                |
| No                                     | Referent  |               |                |
| Yes                                    | 0.75      | 0.12-4.71     | 0.76           |
| BM involvement at diagnosis            |           |               |                |
| No                                     | Referent  |               |                |
| Yes                                    | 2.00      | 0.28-14.46    | 0.49           |

Abbreviations: CR- complete response, BMI- body mass index, PS-performance status, LDH-lactate dehydrogenase

\*There were no CR in albumin at diagnosis, monoclonal protein at diagnosis, and complex cytogenetics, hence were not analyzed.
